# Supplementary material for: Synthesis of the first completely spin-compatible N@C60 cyclopropane derivatives by carefully tuning the DBU base catalyst
Source: Royal Society of Chemistry journal article supplement (doi:10.1039/c5cc01459j), 2015-01-01

Electronic Supplementary Information for the manuscript:

## **Synthesis of the first completely spin-compatible N@C<sub>60</sub> cyclopropane derivatives by carefully tuning the DBU base catalyst**

Shen Zhou, Ilija Rašović, G. Andrew D. Briggs and Kyriakos Porfyrakis\*

### Contents

1. Mass Spectra for products **3** and **5**
2. Ultraviolet–visible spectra for products **3** and **5**
3. <sup>1</sup>H NMR Spectrum for products **3** and **5**
4. Spin retention evolution after the end of the main reaction (fourfold excess of DBU catalyst)

Mass spectrum for product **3** (peaks for the empty-cage adduct only, as the encapsulated nitrogen decomposes before the molecular ion is generated and therefore cannot be detected)

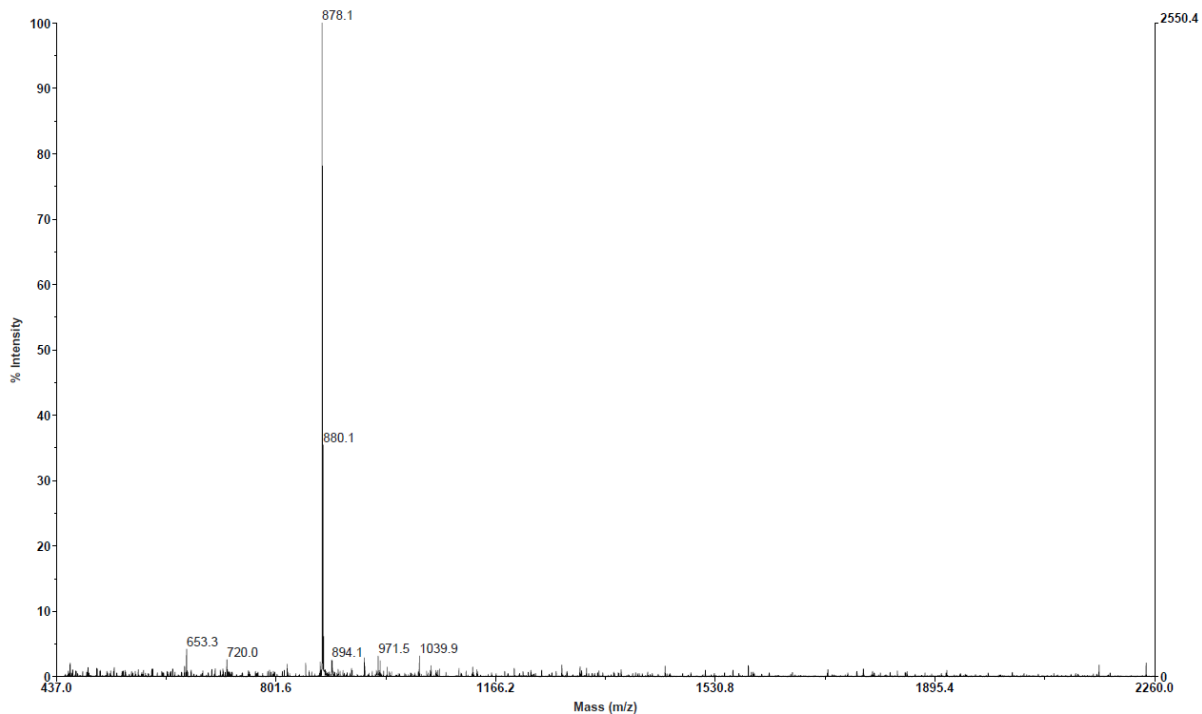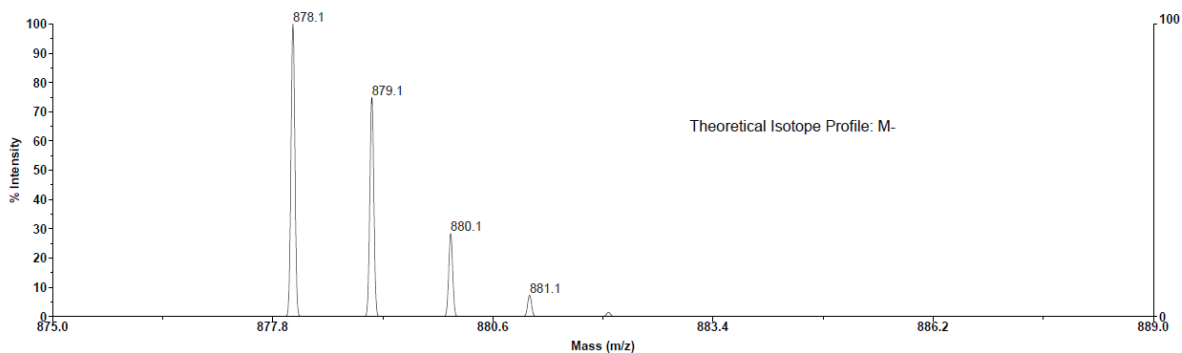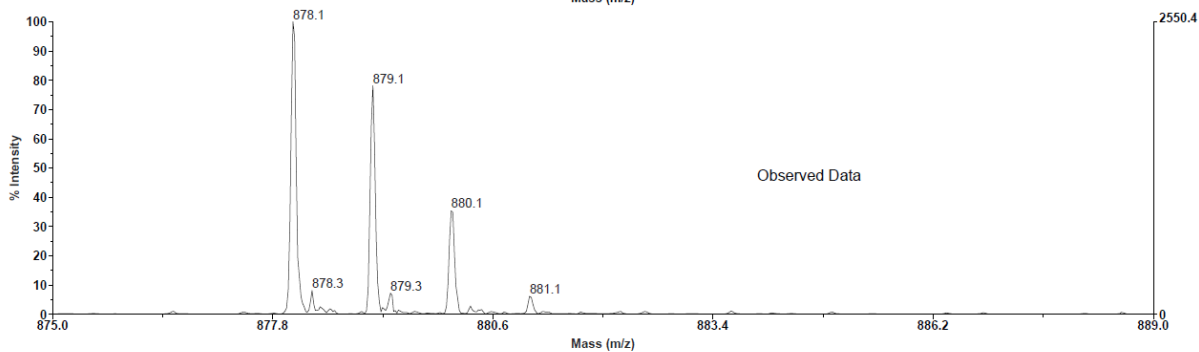

Mass spectrum for product **5** (peaks for the empty-cage adduct only, as the encapsulated nitrogen decomposes before the molecular ion is generated and therefore cannot be detected)

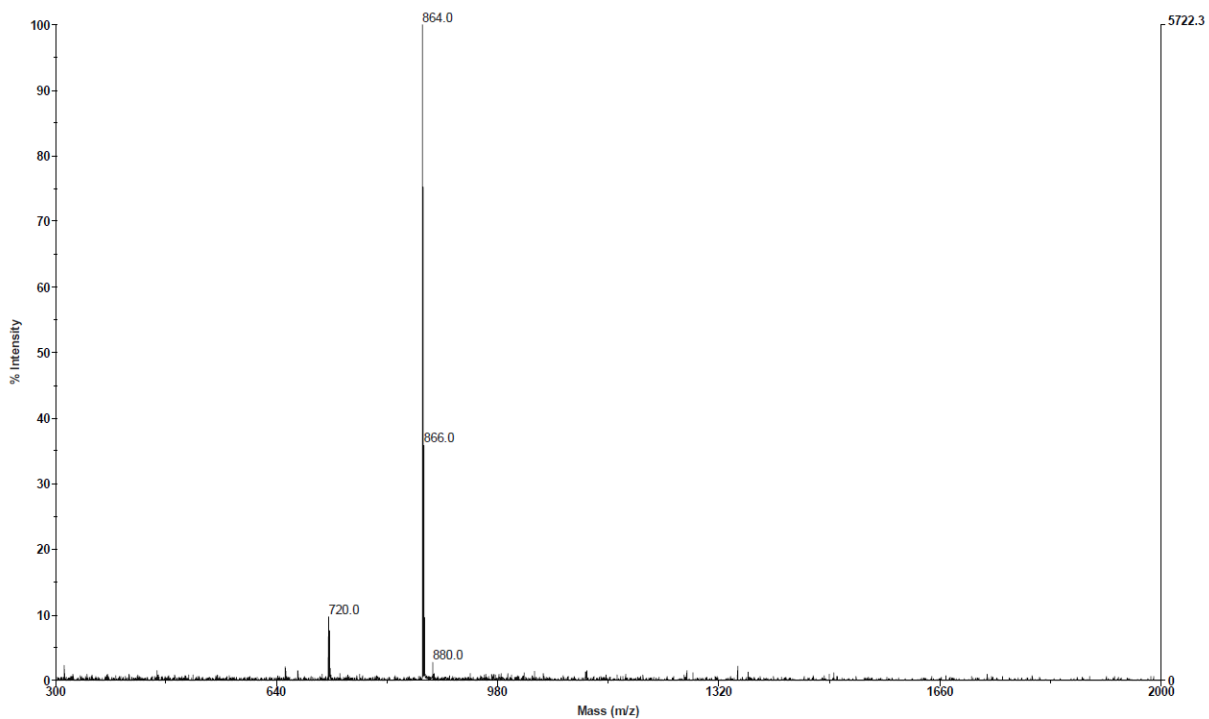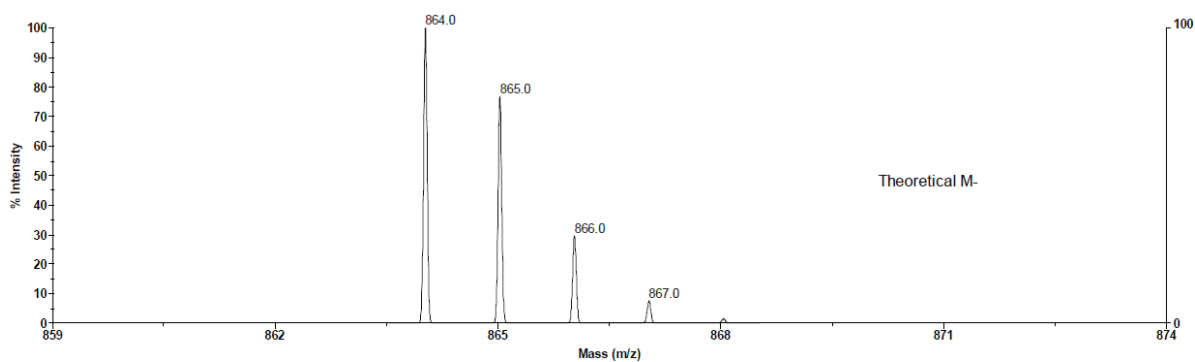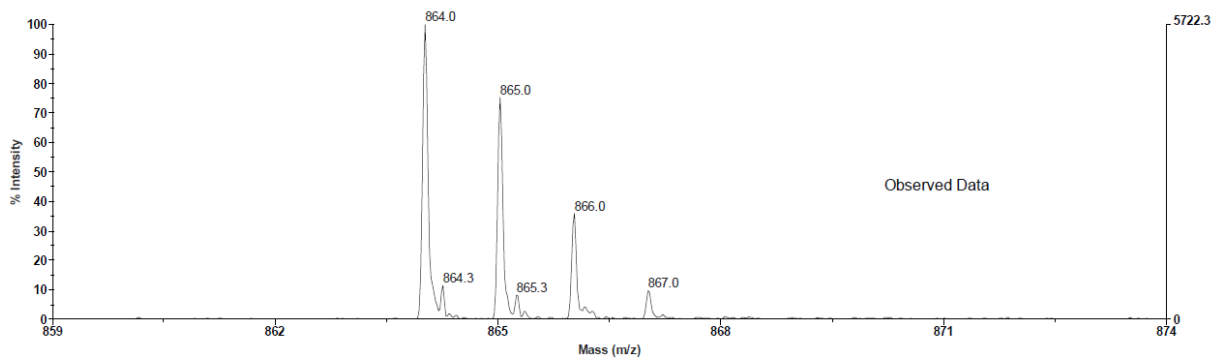

UV-Vis for **3**

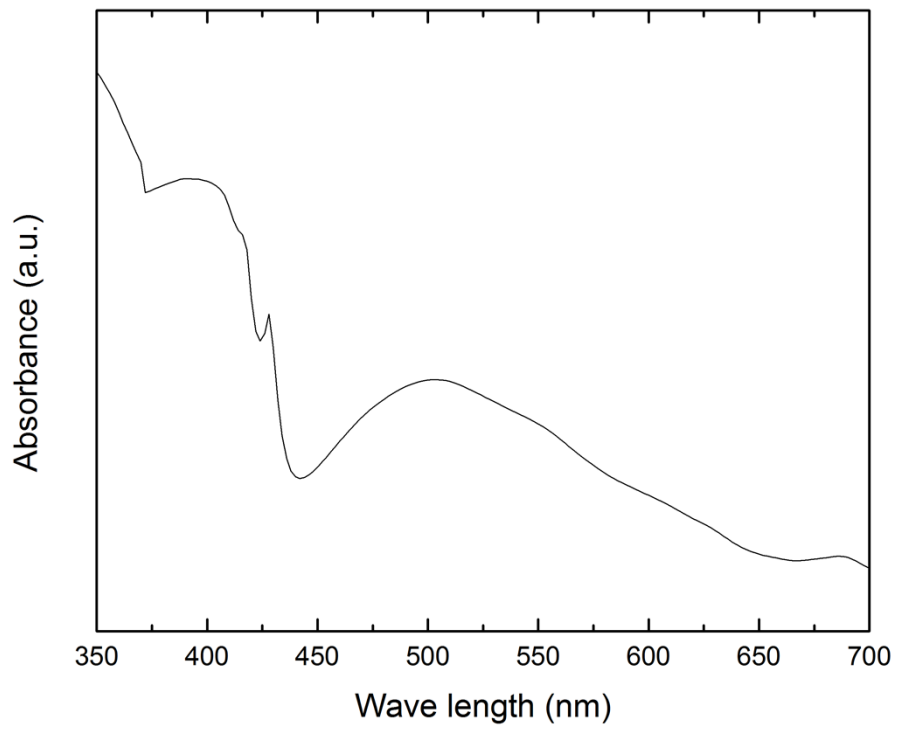

UV-Vis for **5**

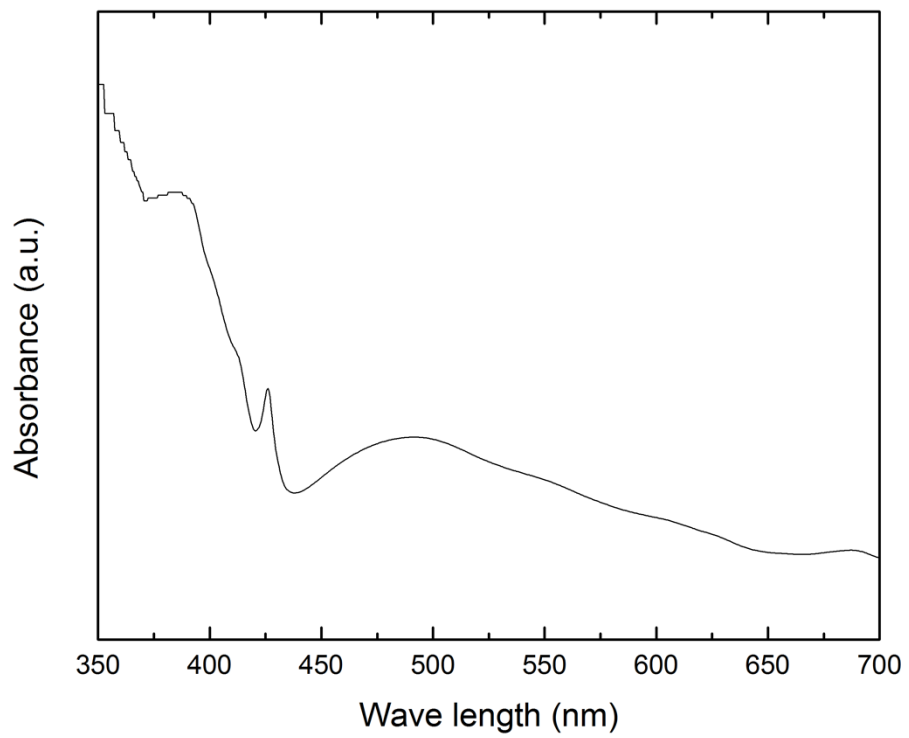

$^1\text{H-NMR}$  for product **3** in  $\text{CDCl}_3$  (with residual of  $\text{CHCl}_3$ , Toluene,  $\text{H}_2\text{O}$ )

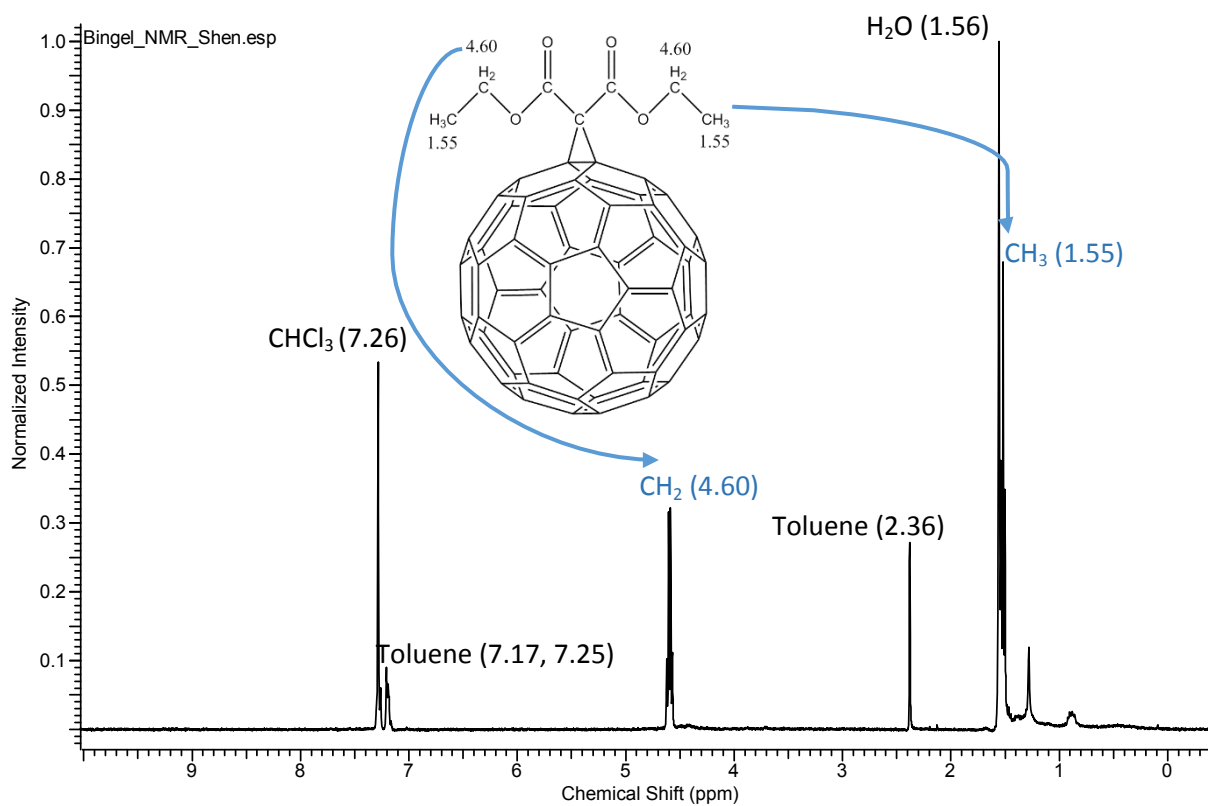

$^1\text{H-NMR}$  for product **5** in  $\text{CDCl}_3+\text{CS}_2$  (with residual of  $\text{CHCl}_3$ , Toluene,  $\text{H}_2\text{O}$ )

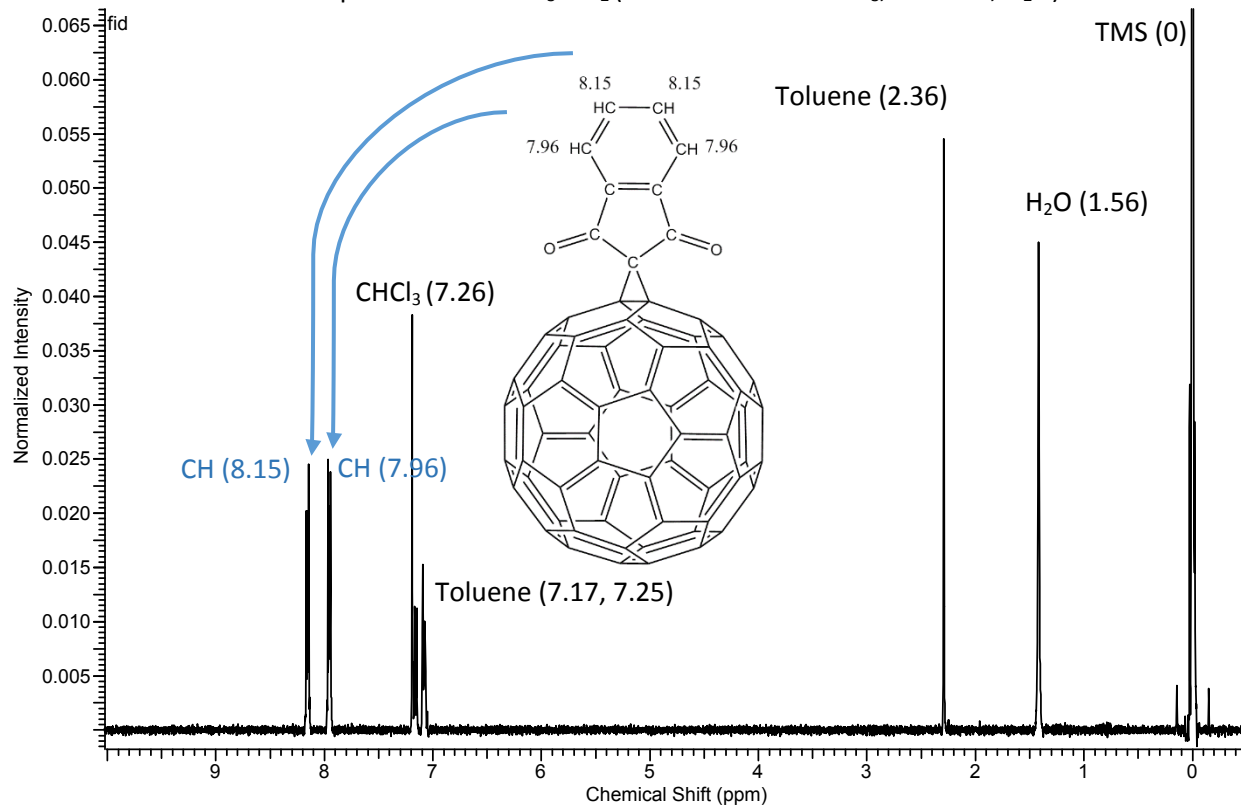

Spin retention evolution after the end of the main reaction (fourfold excess of DBU catalyst)

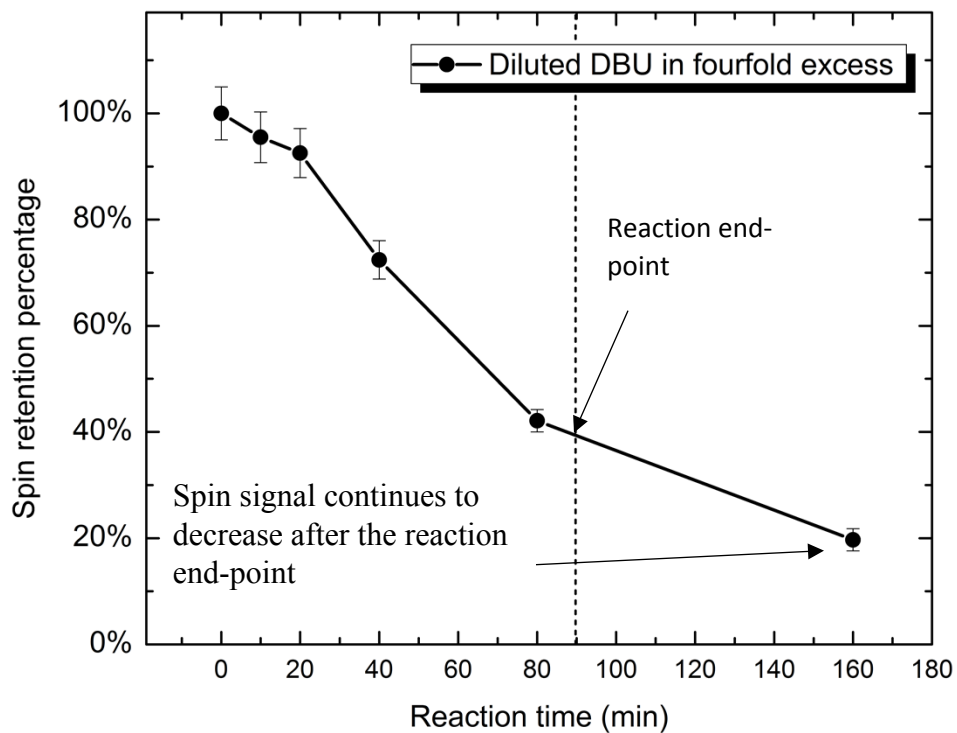

Supplement: c5cc01459j1.pdf [file c5cc01459j1.pdf]
